# Supplementary material
Source: PubMed Central journal article supplement (PMC11028364)
Supplement: 262_2017_2100_MOESM1_ESM.pdf [file 262_2017_2100_MOESM1_ESM.pdf]

## Supplementary Figure 1.

### Scheme

R – Rituximab, F- Fludarabine O – Ontak (Denileukin Diftitox) C - Cyclophosphamide M-Methylprednisolone

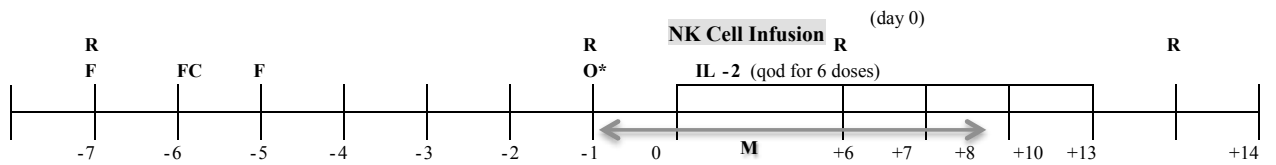

after first 5 patients, the denileukin dose was increased to 3 days on day -4, -3, -2; Pentostatin was used instead of Fludarabine in first 6 patients

## Supplementary Figure 1.

Treatment scheme.

## Supplementary Figure 2.

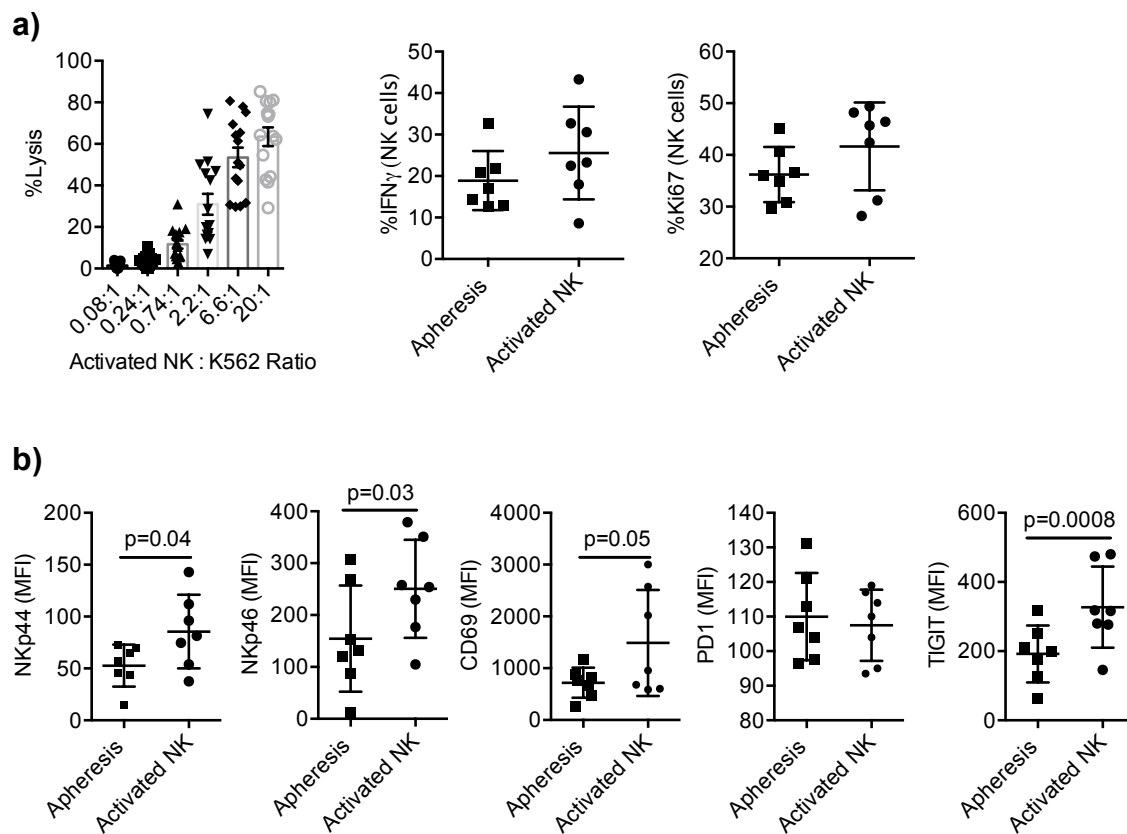

## Supplementary Figure 2.

Donor NK cells were evaluated for **a)** cytotoxicity against K562 at different effector to target ratios and **b)** the expression of activating and inhibitory receptors following 24-hour activation compared to apheresis products. Data are shown as mean $\pm$ SEM, and statistical analyses were done on pooled data using the Student's paired t test. Each symbol represents individual donor.

### Supplementary Figure 3.

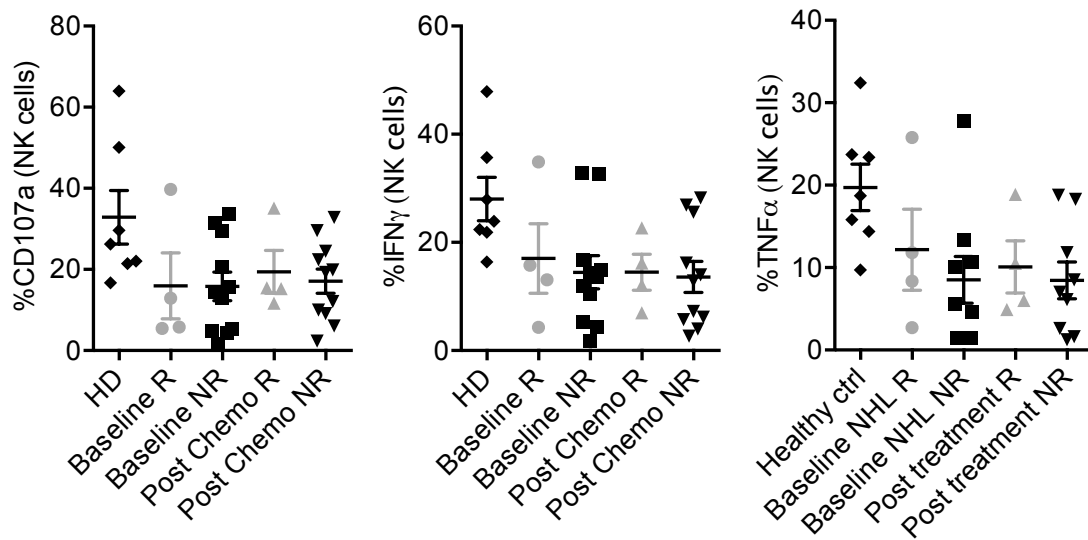

### Supplementary Figure 3.

PBMC from NHL patients (n=14) and healthy controls (n=7) were rested overnight in medium and stimulated with target cells (K562) and cytokines 6 hours prior staining. NK cell degranulation (CD107a), IFN $\gamma$  and TNF $\alpha$  production were evaluated in responders (R) and non-responders (NR) by flow cytometry. Data are shown as mean $\pm$ SEM, and statistical analyses were done on pooled data using the Student's unpaired t test. Each symbol represents different individuals.

**Supplementary Table 1.**

| Marker                   | Clone    | Fluorochrome      | Manufactory     |
|--------------------------|----------|-------------------|-----------------|
| CD3                      | OKT3     | APC/CY7           | Biolegend       |
| CD3                      | OKT3     | BV785             | Biolegend       |
| CD3                      | 7D6      | PE-Texas Red      | Invitrogen      |
| CD56                     | NCAM     | APC/CY7           | Biolegend       |
| CD56                     | NCAM     | PE/CY7            | Biolegend       |
| CD45                     | HI30     | BV711             | Biolegend       |
| HLA-DR                   | L243     | AF488             | Biolegend       |
| CD11b                    | ICRF44   | PE                | Biolegend       |
| CD33                     | WM53     | APC               | Biolegend       |
| CD14                     | M5E2     | Pacific B         | BD Biosciences  |
| CD14                     | M5E2     | APC/CY7           | BD Biosciences  |
| CD19                     | HIB19    | APC/CY7           | BD Biosciences  |
| CD16                     | 3G8      | AF700             | Biolegend       |
| NKp44                    | P44-8    | APC               | Biolegend       |
| NKp46                    | 9.00E+02 | PerCP-eFluor® 710 | BD Biosciences  |
| NKp30                    | P30-15   | PE                | Biolegend       |
| CD107a                   | H4A3     | PerCP/Cy5.5       | Biolegend       |
| IFN $\gamma$             | 4S.B3    | BV650             | Biolegend       |
| Ki67                     | B56      | AF700             | BD Biosciences  |
| TIGIT                    | 741182   | APC               | R&D systems     |
| PD-1                     | MIH4     | APC               | eBiosciences    |
| TIM-3                    | F38-2E2  | PerCP-eFluor® 710 | eBiosciences    |
| KIR3DL1                  | DX9      | AF700             | Biolegend       |
| CD57                     | HCD57    | Pacific B         | Biolegend       |
| KIR2DL2                  | CH-L     | FITC              | BD Biosciences  |
| KIR2DL1                  | HP-MA4   | PerCP/Cy5.5       | eBiosciences    |
| NKG2A                    | Z199     | APC               | Beckman Coulter |
| NKG2C                    | 134591   | PE                | R&D systems     |
| Fixable dead cell marker |          | Near-IR           | Invitrogen      |

**Supplementary Table 1.**

Antibodies and fluorescent dyes used in different experiments.

**Supplementary Table 2.**

| Product number | %CD57 | %KIR2DL1 | %KIR2DL2/<br>DL3 | %KIR3DL1 | %NKG2A | %NKG2C | CD57+NKG2C+ |
|----------------|-------|----------|------------------|----------|--------|--------|-------------|
| 1              | 30    | 35.6     | 21               | 31.9     | 64.3   | 8.16   | 2.33        |
| 2              | 39.8  | 19.2     | 27.3             | 36.9     | 44.9   | 30.9   | 25          |
| 3              | 47.4  | 26.7     | 30.6             | 17.5     | 79.3   | 15.9   | 8.21        |
| 4              | 53    | 39.4     | 40.2             | 45       | 56.8   | 6      | 3.1         |
| 5              | 53.3  | 6.26     | 5.02             | 73.1     | 20.4   | 53.5   | 37.5        |
| 6              | 24.2  | 13.7     | 11.2             | 6.11     | 47.3   | 0.93   | 0.21        |
| 7              | 31.4  | 33.3     | 8.22             | 37.5     | 68.6   | 1.38   | 0.44        |
| 8              | 41.9  | 20.2     | 31.1             | 13.8     | 39.1   | 5.08   | 1.11        |
| 9              | 67.5  | 21.6     | 28.5             | 32.9     | 51.7   | 23     | 17.6        |
| 10             | 29.8  | 24.9     | 40.9             | 21.4     | 44     | 5.64   | 1.3         |
| 11             | 36.5  | 30.1     | 12.8             | 24.7     | 50.2   | 0.43   | 0.12        |
| 12             | 48.9  | 7.2      | 49.9             | 13.4     | 47.9   | 1.23   | 1.03        |
| 13             | 70.4  | 26.3     | 13.1             | 32       | 72.5   | 1.59   | 1.4         |
| 14             | 54.3  | 16       | 46.4             | 42.8     | 79.9   | 3.11   | 2.21        |
| 15             | 20.5  | 21.6     | 22               | 13.5     | 61     | 7.5    | 2.47        |
| Median         | 42%   | 22%      | 27%              | 32%      | 52%    | 6%     | 2.2%        |

**Supplementary Table 2.**

Product NK cell phenotype following 24 hour activation with IL-2.
